# Supplementary material for: Two new xanthones and cytotoxicity from the bark of Garcinia schomburgkiana
Source: Springer Nature journal article supplement (doi:10.1007/s11418-018-1240-8), 2018-08-31
Supplement: MOESM1 [file 16089000]

## Supplementary Material

Two new xanthenes and cytotoxicity from the bark of *Garcinia schomburgkiana*

Sutin Kaennakam <sup>1,\*</sup>. Kamonwan Mudsing <sup>1</sup>. Kitiya Rassamee <sup>2</sup>. Pongpun Siripong <sup>2</sup>.

Santi Tip-pyang <sup>1,\*</sup>

<sup>1</sup>Center of Excellence in Natural Products Chemistry, Department of Chemistry, Faculty of Science, Chulalongkorn University, Bangkok 10330, Thailand

<sup>2</sup>Natural Products Research Section, Research Division, National Cancer Institute, Bangkok 10400, Thailand

### Corresponding authors

Assoc. Prof. Dr. Santi Tip-pyang, Tel.: +66 89 7917596; E-mail address: santi.Ti@chula.ac.th

Dr.Sutin Kaennakam, Tel.; +66 91 4142346; E-mail address: n-s-k-@hotmail.com

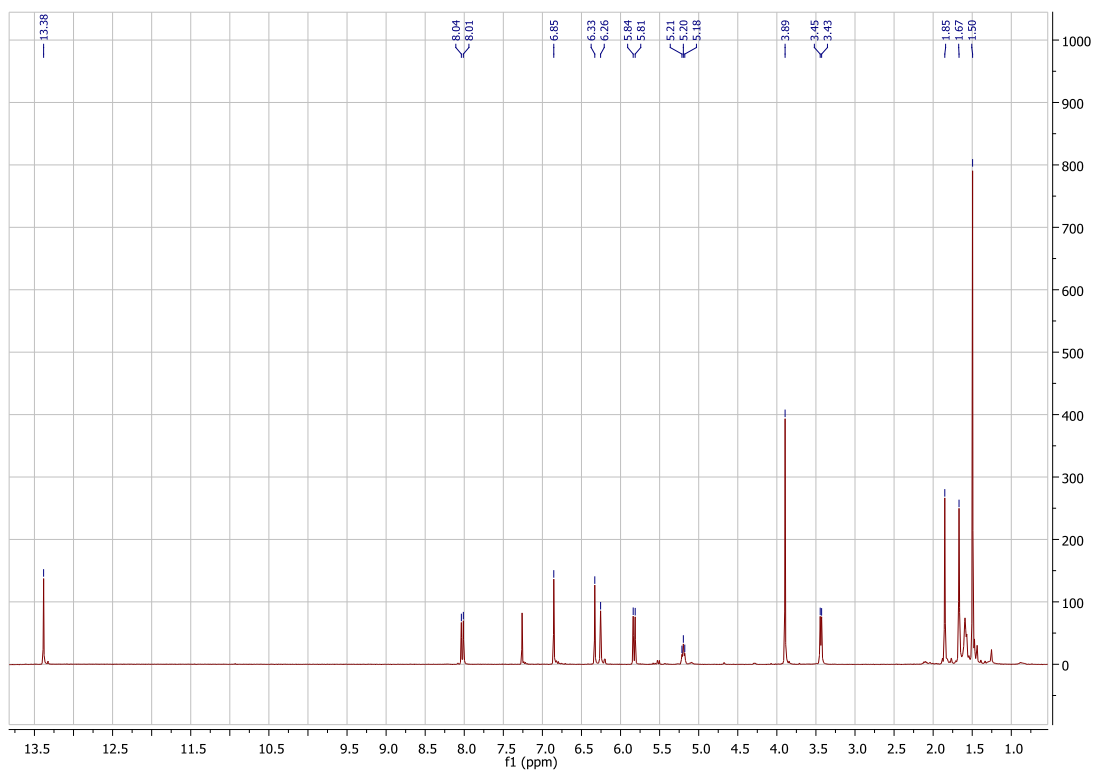

Figure S.1 <sup>1</sup>H NMR spectrum of **1** in CDCl<sub>3</sub>

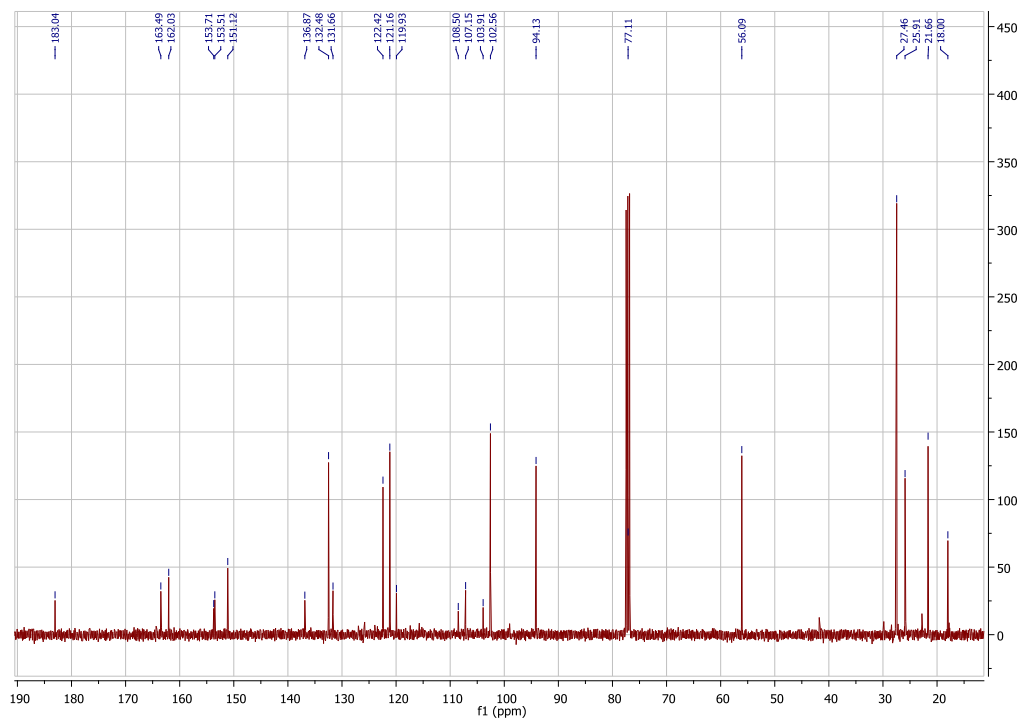

Figure S.2  $^{13}\text{C}$  NMR spectrum of **1** in  $\text{CDCl}_3$

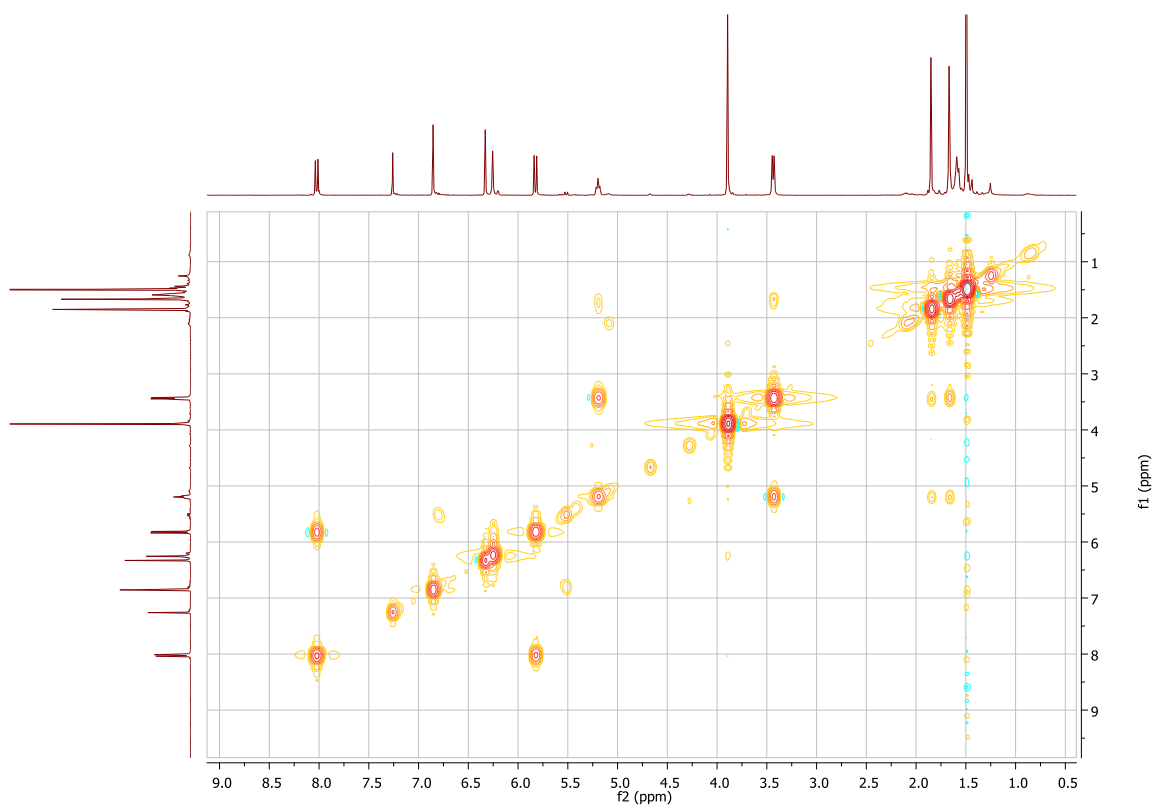

Figure S.3 COSY NMR spectrum of **1** in  $\text{CDCl}_3$

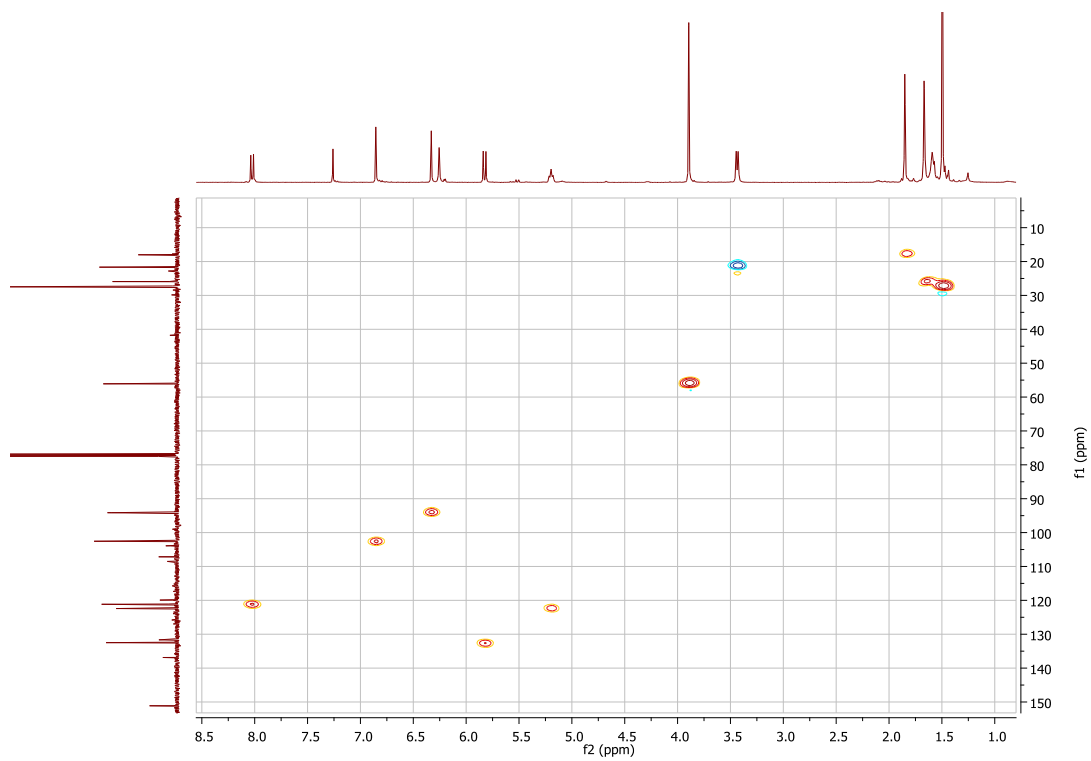

**Figure S.4** HSQC NMR spectrum of **1** in  $\text{CDCl}_3$

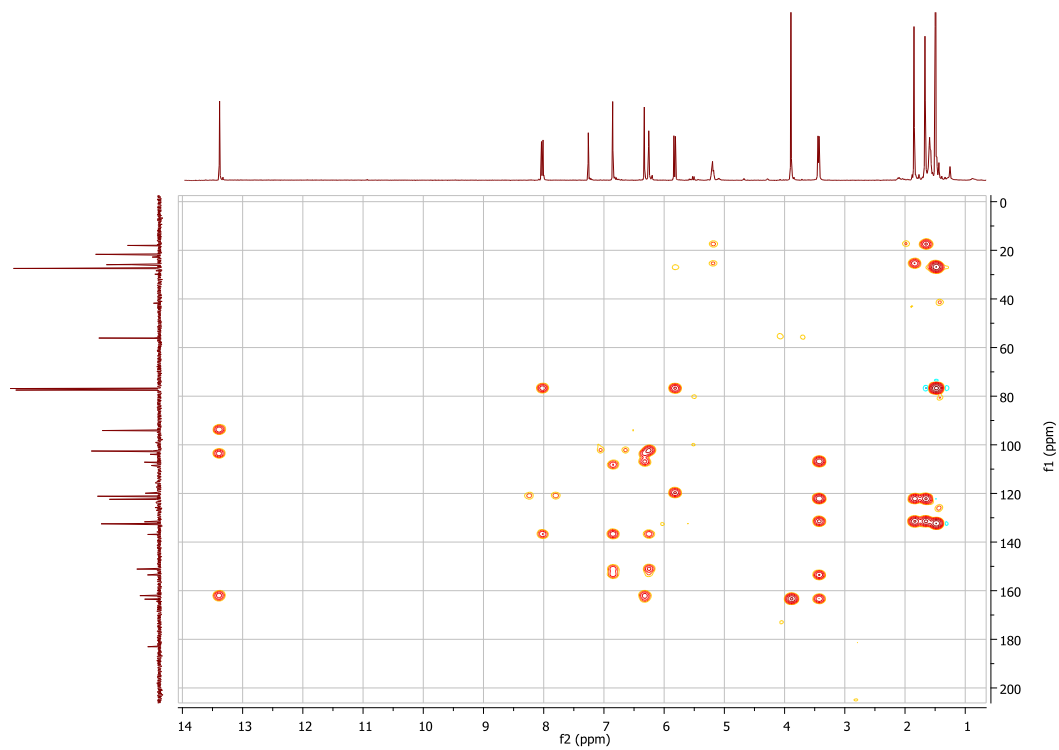

**Figure S.5** HMBC NMR spectrum of **1** in  $\text{CDCl}_3$

## Mass Spectrum List Report

**Analysis Info**  
Analysis Name: D:\Data\Data Service\180330\_neg\_GST1.d  
Method: NV\_neg\_0.3min\_profile\_1segment\_lowNubulizerDrygas(2).m  
Sample Name: 180330\_neg\_GST1  
Comment:  
Acquisition Date: 3/30/2018 2:49:14 PM  
Operator: CU.  
Instrument / Ser#: micrOTOF-Q II 10335

**Acquisition Parameter**

|             |            |                       |           |                  |           |
|-------------|------------|-----------------------|-----------|------------------|-----------|
| Source Type | ESI        | Ion Polarity          | Negative  | Set Nebulizer    | 0.4 Bar   |
| Focus       | Not active | Set Capillary         | 4000 V    | Set Dry Heater   | 200 °C    |
| Scan Begin  | 50 m/z     | Set End Plate Offset  | -500 V    | Set Dry Gas      | 4.0 l/min |
| Scan End    | 1500 m/z   | Set Collision Cell RF | 150.0 Vpp | Set Divert Valve | Waste     |

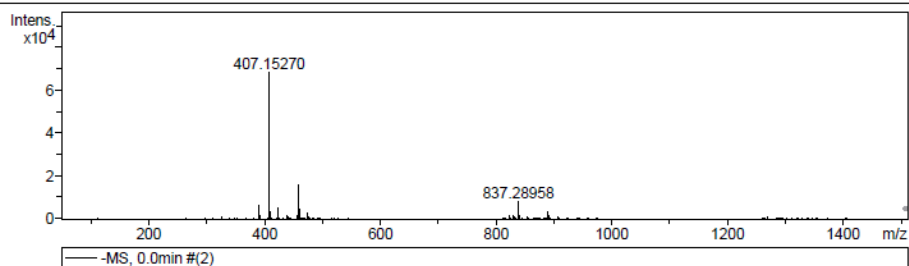

| #  | m/z       | Res. | S/N    | I     | FWHM    |
|----|-----------|------|--------|-------|---------|
| 1  | 325.11046 | 8740 | 56.1   | 617   | 0.03720 |
| 2  | 391.11966 | 8787 | 587.2  | 6459  | 0.04451 |
| 3  | 392.12466 | 8698 | 155.1  | 1706  | 0.04508 |
| 4  | 407.15270 | 8194 | 6222.5 | 68448 | 0.04969 |
| 5  | 408.15461 | 9193 | 1676.9 | 18446 | 0.04440 |
| 6  | 409.15659 | 8716 | 297.6  | 3274  | 0.04694 |
| 7  | 423.14904 | 8822 | 451.1  | 4962  | 0.04797 |
| 8  | 424.15208 | 8647 | 107.6  | 1184  | 0.04905 |
| 9  | 439.14125 | 9456 | 109.9  | 1209  | 0.04644 |
| 10 | 441.15279 | 8747 | 90.6   | 997   | 0.05043 |

Figure S.6 Mass spectrum of 1

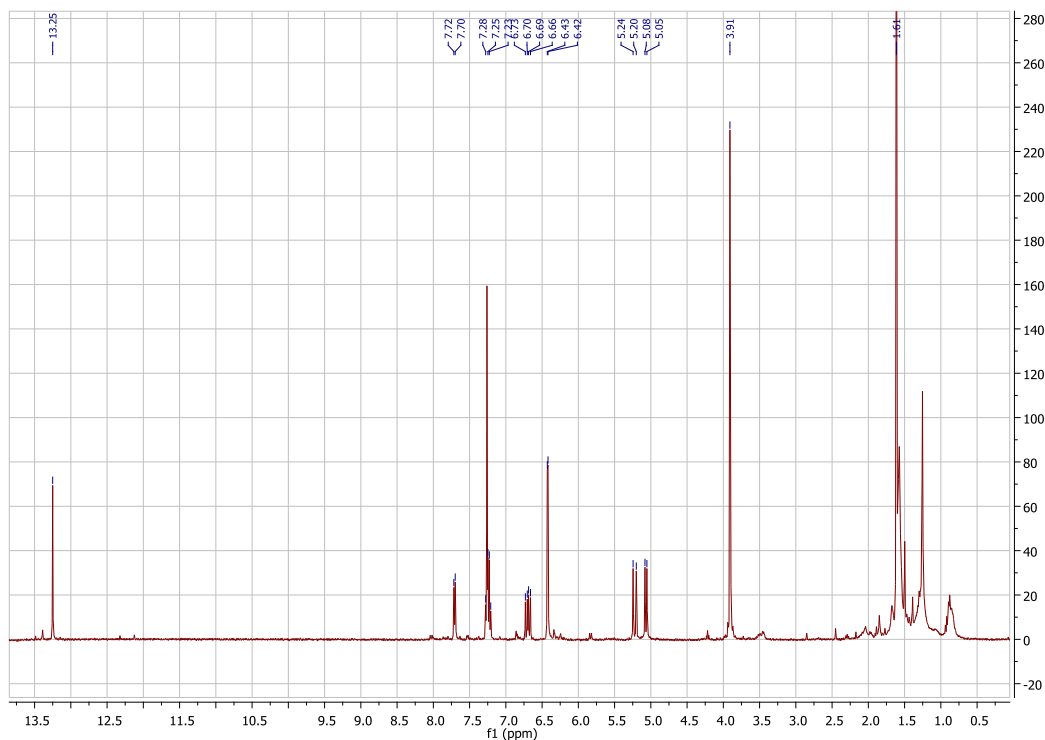

Figure S.7  $^1\text{H}$  NMR spectrum of 2 in  $\text{CDCl}_3$

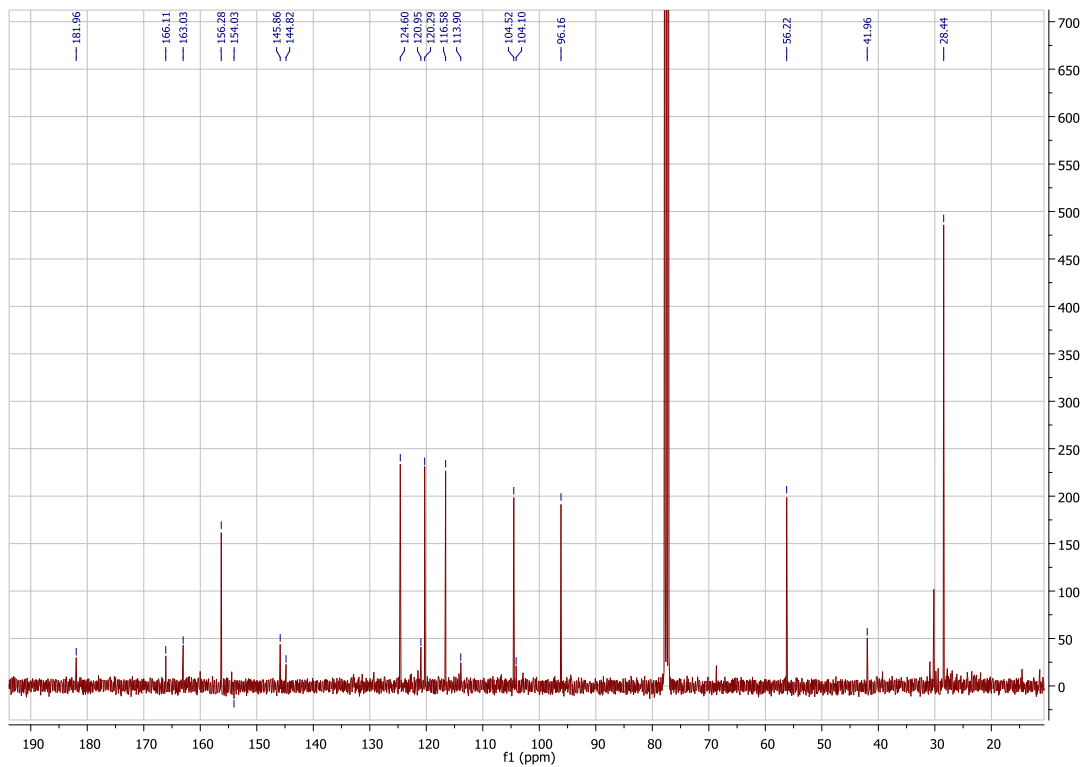

**Figure S.8**  $^{13}\text{C}$  NMR spectrum of **2** in  $\text{CDCl}_3$

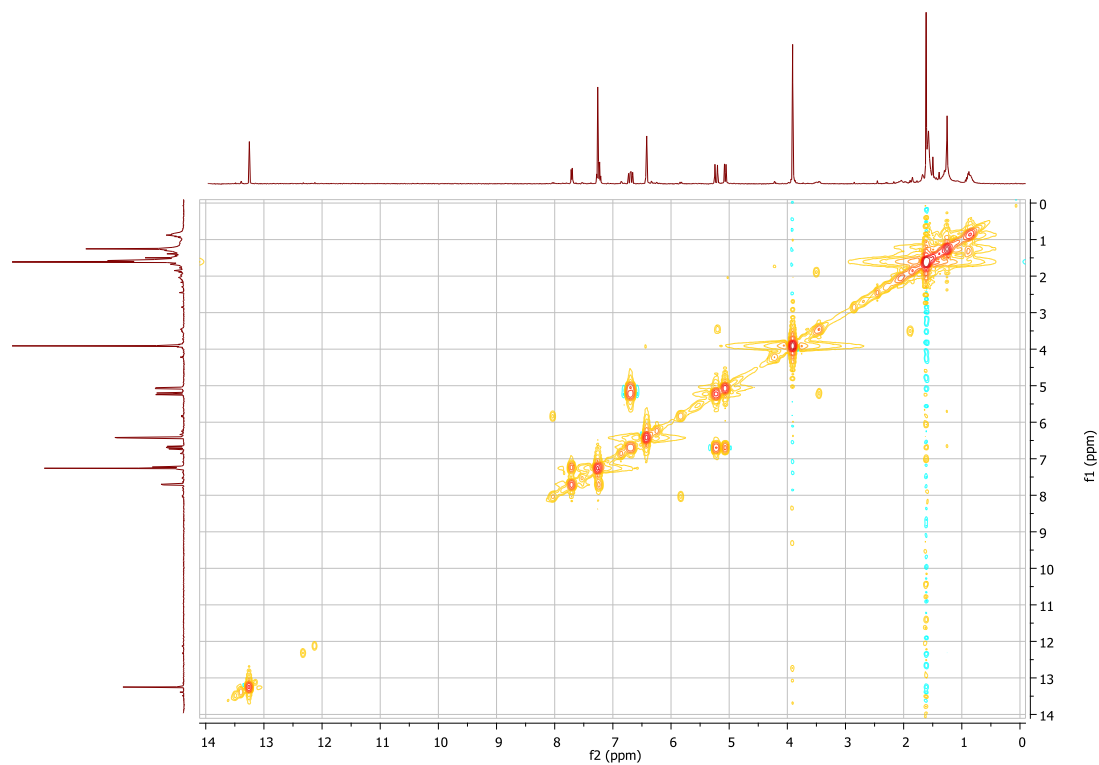

**Figure S.9** COSY NMR spectrum of **2** in  $\text{CDCl}_3$

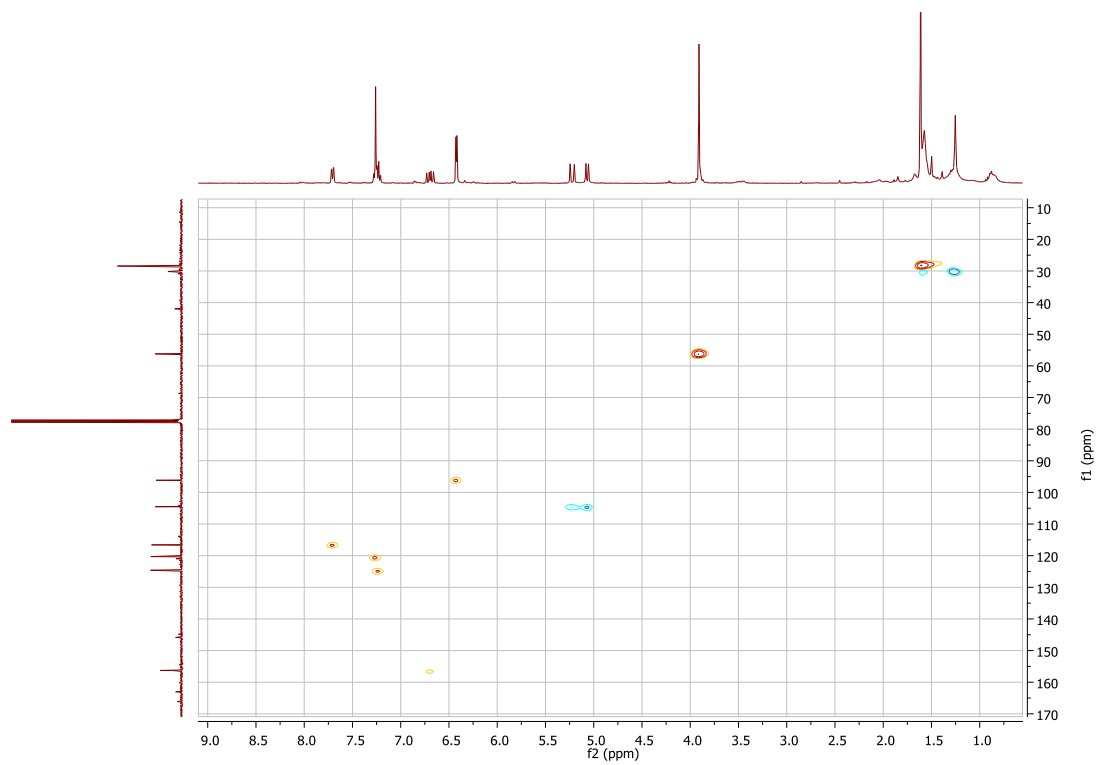

**Figure S.10** HSQC NMR spectrum of **2** in CDCl<sub>3</sub>

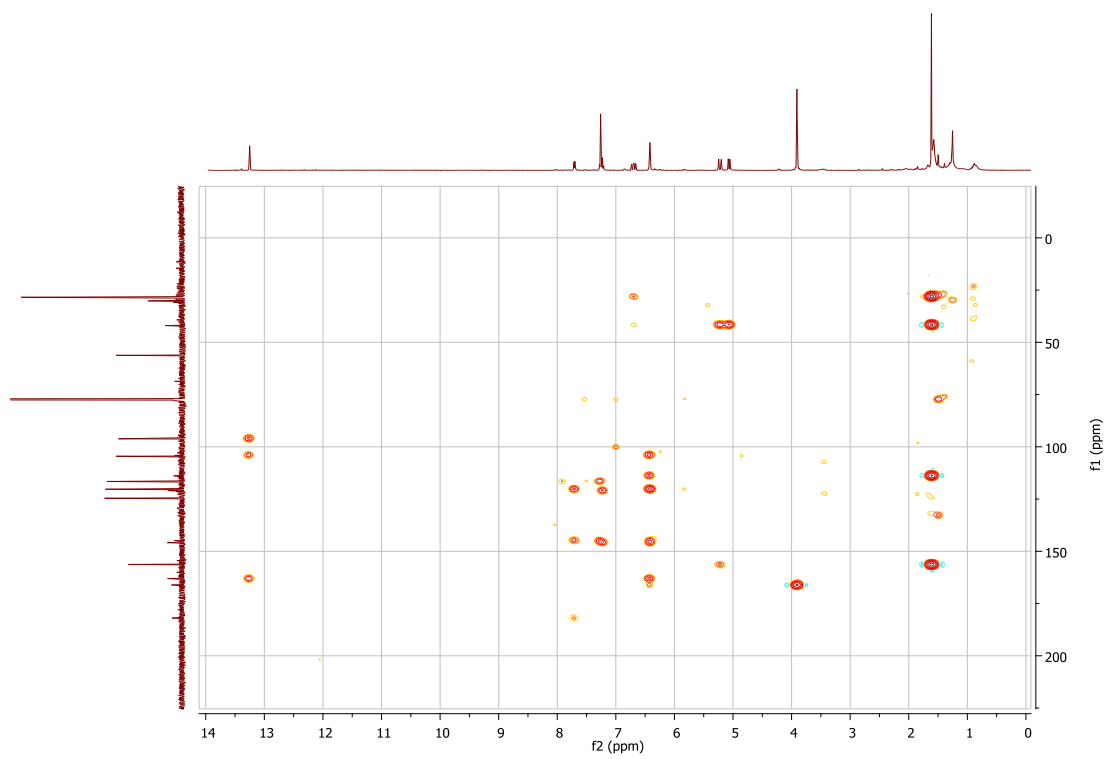

**Figure S.11** HMBC NMR spectrum of **2** in CDCl<sub>3</sub>

## Mass Spectrum List Report

**Analysis Info**

|               |                                                        |                   |                      |
|---------------|--------------------------------------------------------|-------------------|----------------------|
| Analysis Name | D:\Data\Data Service\180330_neg_GST2.d                 | Acquisition Date  | 3/30/2018 3:32:30 PM |
| Method        | NV_neg_0.3min_profile_1segment_lowNubulizerDrygas(2).m | Operator          | CU.                  |
| Sample Name   | 180330_neg_GST2                                        | Instrument / Ser# | micrOTOF-Q II 10335  |
| Comment       |                                                        |                   |                      |

**Acquisition Parameter**

|             |            |                       |           |                  |           |
|-------------|------------|-----------------------|-----------|------------------|-----------|
| Source Type | ESI        | Ion Polarity          | Negative  | Set Nebulizer    | 0.4 Bar   |
| Focus       | Not active | Set Capillary         | 4000 V    | Set Dry Heater   | 200 °C    |
| Scan Begin  | 50 m/z     | Set End Plate Offset  | -500 V    | Set Dry Gas      | 4.0 l/min |
| Scan End    | 1500 m/z   | Set Collision Cell RF | 150.0 Vpp | Set Divert Valve | Waste     |

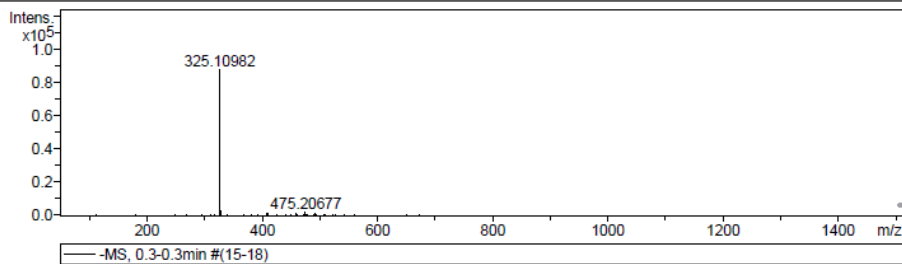

| #  | m/z       | Res. | S/N     | I     | FWHM    |
|----|-----------|------|---------|-------|---------|
| 1  | 112.98520 | 5634 | 181.1   | 498   | 0.02005 |
| 2  | 248.95932 | 7848 | 82.1    | 226   | 0.03172 |
| 3  | 269.04641 | 7606 | 87.8    | 242   | 0.03538 |
| 4  | 295.06007 | 8551 | 103.1   | 284   | 0.03451 |
| 5  | 310.08310 | 8393 | 81.7    | 225   | 0.03695 |
| 6  | 311.09293 | 8656 | 196.8   | 541   | 0.03594 |
| 7  | 325.10982 | 7604 | 31758.2 | 87335 | 0.04276 |
| 8  | 326.11206 | 8649 | 6810.3  | 18728 | 0.03770 |
| 9  | 327.11352 | 8547 | 981.1   | 2698  | 0.03827 |
| 10 | 328.11542 | 7977 | 110.6   | 304   | 0.04113 |

**Figure S.12** Mass spectrum of **2**
